# Supplementary material
Source: Research Square preprint supplement (doi:10.21203/rs.3.rs-9553848/v1)
Supplement: Supplementary file 1 [file 0c852d110aee94bdaf2fb1cc.pdf]

All supplementary files in .xls format are available on Sciebo:

<https://uni-duisburg-essen.sciebo.de/s/9RRRbg5dTkJAxZb?dir=/2026-04-09%20Submission%20Nat%20Com/Supplementary>
